# Supplementary material for: The Transcriptional Differences of Avian CD4+CD8+ Double-Positive T Cells and CD8+ T Cells From Peripheral Blood of ALV-J Infected Chickens Revealed by Smart-Seq2
Source: Front Cell Infect Microbiol. 2021 Nov 10;11:747094. doi: 10.3389/fcimb.2021.747094 (PMC8631335; doi:10.3389/fcimb.2021.747094)
Supplement: Supplementary File 4 — Pathways for brown module gene enrichment. [file Table_4.xlsx]

## Sheet: brown.path
KEGG_A_class	KEGG_B_class	Pathway	brown (862)	All (4703)	Pvalue	Qvalue	Pathway ID	Genes	K_IDs
Genetic Information Processing	Translation	Ribosome	71	116	3.39e-25	7.42e-23	ko03010	ENSGALG00000015617(-);ENSGALG00000008597(MRPL2);ENSGALG00000016392(RPS7);ENSGALG00000016775(RPL31);ENSGALG00000001634(RPL23);ENSGALG00000012229(RPS29);ENSGALG00000001658(RPL19);ENSGALG00000030378(RPL11);ENSGALG00000008620(RPL39);ENSGALG00000029897(RPL30);ENSGALG00000003197(RPL7A);ENSGALG00000015339(RPL24);ENSGALG00000015195(RPS15);ENSGALG00000010124(RPS8);ENSGALG00000049865(RPL18A);ENSGALG0000000…	K02973+K02886+K02993+K02910+K02894+K02980+K02885+K02868+K02924+K02908+K02936+K02896+K02958+K02995+K02882+K02873+K02901+K02927+K02877+K02951+K02912+K02918+K02895+K02985+K02875+K02978+K02934+K02991+K02949+K02891+K02984+K02960+K02900+K02953+K02917+K02942+K02950+K02987+K02962+K02929+K02915+K02870+K02880+K02940+K02947+K02911+K02898+K02975+K02943+K02905+K02954+K02891+K02978+K02938+K02974+K02969+K02971+…
Genetic Information Processing	Folding, sorting and degradation	Protein processing in endoplasmic reticulum	47	148	4.46e-05	0.00488	ko04141	ENSGALG00000038290(P4HB);ENSGALG00000001593(UFD1);ENSGALG00000005907(RPN1);ENSGALG00000033789(HSP90B1);ENSGALG00000001782(PLAA);ENSGALG00000035699(MARCH6);ENSGALG00000005667(UBE2G2);ENSGALG00000016447(PDIA6);ENSGALG00000006417(SEC24A);ENSGALG00000038753(SAR1B);ENSGALG00000035236(BCAP31);ENSGALG00000012404(ERO1A);ENSGALG00000013157(BAG1);ENSGALG00000042214(UBQLN4);ENSGALG00000008320(EDEM1);ENSGALG…	K09580+K14016+K12666+K09487+K14018+K10661+K04555+K09584+K14007+K07953+K14009+K10950+K09555+K04523+K10084+K14000+K14004+K03237+K07151+K06689+K09490+K07151+K09586+K05638+K03283+K09054+K09027+K14027+K03347+K09486+K12667+K12275+K13525+K03868+K04374+K14005+K11863+K13251+K13984+K09521+K09485+K07765+K04079+K04440+K10976+K08860+K09562
Metabolism	Energy metabolism	Oxidative phosphorylation	38	117	0.000140626	0.0103	ko00190	ENSGALG00000028026(NDUFS4);ENSGALG00000025819(UQCRFS1);ENSGALG00000008821(NDUFA5);ENSGALG00000008836(ATP6AP1);ENSGALG00000002490(UQCRC2);ENSGALG00000007926(ATP5PD);ENSGALG00000004302(NDUFA10);ENSGALG00000008613(NDUFA1);ENSGALG00000035996(COX6C);ENSGALG00000032875(ATP5F1D);ENSGALG00000010091(ATP6V0B);ENSGALG00000038801(ATP5F1B);ENSGALG00000039212(NDUFA13);ENSGALG00000003256(ATP6V0A1);ENSGALG000000…	K03937+K00411+K03949+K03662+K00415+K02138+K03954+K03945+K02268+K02134+K03661+K02133+K11353+K02154+K03968+K03959+K02150+K03946+K03934+K02127+K11352+K02140+K00236+K02264+K02132+K03950+K03966+K02136+K02146+K02152+K03955+K03957+K02129+K03956+K03964+K02145+K03962+K03967
Cellular Processes	Transport and catabolism	Autophagy - animal	37	117	0.000313797	0.0146	ko04140	ENSGALG00000041226(RRAGB);ENSGALG00000005902(RAB7A);ENSGALG00000008107(IRS4);ENSGALG00000008282(ATG4A);ENSGALG00000028530(PRKACB);ENSGALG00000008358(AMBRA1);ENSGALG00000005160(VMP1);ENSGALG00000014786(PIK3R1);ENSGALG00000005198(RPS6KB1);ENSGALG00000040651(IGF1R);ENSGALG00000008572(LAMP2);ENSGALG00000006462(PPP2CA);ENSGALG00000007687(MAP2K1);ENSGALG00000002345(ATG12);ENSGALG00000037697(LAMP1);ENSG…	K16185+K07897+K07187+K08342+K04345+K17985+K21248+K02649+K04688+K05087+K06528+K04382+K04368+K08336+K06528+K04724+K03237+K07920+K08341+K01365+K15464+K07830+K04456+K01110+K00922+K08803+K01365+K00914+K07203+K03175+K17906+K10802+K04366+K08341+K04440+K08860+K07187
Genetic Information Processing	Transcription	Spliceosome	34	105	0.000332775	0.0146	ko03040	ENSGALG00000026999(SNRPB2);ENSGALG00000008507(THOC2);ENSGALG00000017207(CWC15);ENSGALG00000004133(SRSF10);ENSGALG00000002087(NCBP1);ENSGALG00000016501(SF3B6);ENSGALG00000013352(SF3B4);ENSGALG00000003385(-);ENSGALG00000017357(SRSF2);ENSGALG00000031298(SNRNP200);ENSGALG00000041746(ZMAT2);ENSGALG00000000533(SRSF3);ENSGALG00000010627(PRPF38A);ENSGALG00000028409(SNRPG);ENSGALG00000040086(HNRNPKL);ENSG…	K11094+K12879+K12863+K12900+K12882+K12833+K12831+K12623+K12891+K12854+K12848+K12892+K12849+K11099+K12886+K12893+K11087+K12874+K03283+K12860+K12816+K12861+K12624+K12823+K12819+K12866+K12840+K12859+K12885+K12880+K12834+K12825+K12855+K12888
Human Diseases	Infectious diseases	Herpes simplex infection	41	140	0.000899808	0.0328	ko05168	ENSGALG00000015185(TAF13);ENSGALG00000040016(PPP1CA);ENSGALG00000029616(HCFC2);ENSGALG00000012356(TAB2);ENSGALG00000037546(SRPK1);ENSGALG00000011020(CYCS);ENSGALG00000012304(NFKB1);ENSGALG00000009840(TBK1);ENSGALG00000009903(IFNG);ENSGALG00000017357(SRSF2);ENSGALG00000004571(PPP1CC);ENSGALG00000000533(SRSF3);ENSGALG00000009565(EIF2S1);ENSGALG00000040086(HNRNPKL);ENSGALG00000000990(SRSF6);ENSGALG0…	K03127+K06269+K14966+K04404+K15409+K08738+K02580+K05410+K04687+K12891+K06269+K12892+K03237+K12886+K12893+K07211+K12499+K05131+K04734+K05133+K15410+K04389+K06752+K06751+K11299+K04379+K06752+K06752+K03347+K15414+K09849+K06751+K06269+K03175+K06505+K11838+K03174+K04440+K04390+K08860+K03134
Genetic Information Processing	Translation	RNA transport	38	130	0.00142435	0.0446	ko03013	ENSGALG00000041972(POP4);ENSGALG00000003337(EIF3I);ENSGALG00000008092(NXT2);ENSGALG00000008507(THOC2);ENSGALG00000002569(RAN);ENSGALG00000002087(NCBP1);ENSGALG00000042112(EIF4E);ENSGALG00000028517(EIF1);ENSGALG00000007653(RAE1);ENSGALG00000002430(SMN);ENSGALG00000003205(EIF4EBP1);ENSGALG00000017368(TRNT1);ENSGALG00000040522(EIF3H);ENSGALG00000009934(NUP107);ENSGALG00000008419(SEC13);ENSGALG000000…	K03538+K03246+K14285+K12879+K07936+K12882+K03259+K03113+K14298+K13129+K07205+K00974+K03247+K14301+K14004+K03237+K03260+K03253+K03113+K13130+K03754+K14525+K12880+K18644+K14319+K14327+K09291+K14530+K03231+K14308+K13171+K03251+K03249+K14314+K14523+K13136+K03260+K03539
Genetic Information Processing	Folding, sorting and degradation	Proteasome	15	39	0.0024426	0.0669	ko03050	ENSGALG00000009733(SEM1);ENSGALG00000000259(PSMF1);ENSGALG00000012039(PSMA3);ENSGALG00000000905(PSMB4);ENSGALG00000007315(PSMD6);ENSGALG00000039624(PSMA5);ENSGALG00000009903(IFNG);ENSGALG00000000707(PSMD7);ENSGALG00000039387(PSMA2);ENSGALG00000003046(PSMA4);ENSGALG00000030411(PSMA7);ENSGALG00000005200(ADRM1);ENSGALG00000000349(PSMC5);ENSGALG00000008163(PSME4);ENSGALG00000026421(PSMB2)	K10881+K06700+K02727+K02736+K03037+K02729+K04687+K03038+K02726+K02728+K02731+K06691+K03066+K06699+K02734
Cellular Processes	Transport and catabolism	Mitophagy - animal	19	55	0.00295448	0.0711	ko04137	ENSGALG00000005902(RAB7A);ENSGALG00000001525(-);ENSGALG00000008358(AMBRA1);ENSGALG00000041277(UBC);ENSGALG00000042822(TAX1BP1);ENSGALG00000039583(cmi9);ENSGALG00000009840(TBK1);ENSGALG00000010190(TBC1D15);ENSGALG00000003208(GABARAPL2);ENSGALG00000010476(BNIP3);ENSGALG00000005998(RRAS2);ENSGALG00000040265(USP30);ENSGALG00000015297(FOXO3);ENSGALG00000041873(MFN1);ENSGALG00000028187(FUNDC1);ENSGALG0…	K07897+K21348+K17985+K04551+K21347+K09455+K05410+K20168+K08341+K15464+K07830+K11851+K09408+K21356+K17986+K04374+K08341+K04440+K08860
Cellular Processes	Cell growth and death	Cellular senescence	39	140	0.0032478	0.0711	ko04218	ENSGALG00000040016(PPP1CA);ENSGALG00000003522(RBBP4);ENSGALG00000014786(PIK3R1);ENSGALG00000012792(HIPK2);ENSGALG00000006503(VDAC1);ENSGALG00000023648(PPP3R1);ENSGALG00000007687(MAP2K1);ENSGALG00000003205(EIF4EBP1);ENSGALG00000012304(NFKB1);ENSGALG00000041463(VDAC3);ENSGALG00000004571(PPP1CC);ENSGALG00000011442(TGFBR2);ENSGALG00000028318(CDKN1A);ENSGALG00000011695(HIPK3);ENSGALG00000033631(MYC);E…	K06269+K10752+K02649+K08826+K05862+K06268+K04368+K07205+K02580+K15041+K06269+K04388+K06625+K08826+K04377+K03362+K07830+K11411+K04456+K09408+K01110+K04500+K06751+K04402+K00922+K04433+K06751+K07203+K04446+K04402+K02183+K06269+K04503+K02183+K07201+K04366+K05863+K04960+K05863
Human Diseases	Infectious diseases	Salmonella infection	20	66	0.0120444	0.24	ko05132	ENSGALG00000005902(RAB7A);ENSGALG00000008797(WASL);ENSGALG00000006691(ARPC4);ENSGALG00000038096(NOS2);ENSGALG00000003820(ARPC3);ENSGALG00000012304(NFKB1);ENSGALG00000009903(IFNG);ENSGALG00000032717(CCL4);ENSGALG00000032660(IFNGR2);ENSGALG00000009621(ACTB);ENSGALG00000032588(ARPC1B);ENSGALG00000014922(ROCK1);ENSGALG00000028037(FOS);ENSGALG00000020927(ARPC5);ENSGALG00000002843(RILP);ENSGALG00000011…	K07897+K05747+K05755+K13241+K05756+K02580+K04687+K12964+K05133+K05692+K05757+K04514+K04379+K05754+K13883+K05758+K05759+K04393+K10407+K04440
Environmental Information Processing	Signal transduction	FoxO signaling pathway	33	126	0.0169291	0.309	ko04068	ENSGALG00000014725(PLK2);ENSGALG00000016359(FBXO25);ENSGALG00000008107(IRS4);ENSGALG00000011661(SOD2);ENSGALG00000014786(PIK3R1);ENSGALG00000040651(IGF1R);ENSGALG00000007687(MAP2K1);ENSGALG00000002345(ATG12);ENSGALG00000010129(PLK3);ENSGALG00000011442(TGFBR2);ENSGALG00000028318(CDKN1A);ENSGALG00000003939(KLF2);ENSGALG00000003208(GABARAPL2);ENSGALG00000010476(BNIP3);ENSGALG00000007357(BCL6);ENSGAL…	K08861+K10305+K07187+K04564+K02649+K05087+K04368+K08336+K08862+K04388+K06625+K17845+K08341+K15464+K15618+K11411+K04456+K09408+K04389+K01110+K04500+K04402+K00922+K04402+K04503+K07201+K05072+K13304+K11838+K04366+K08341+K04440+K07187
Environmental Information Processing	Signal transduction	Apelin signaling pathway	29	112	0.0279888	0.472	ko04371	ENSGALG00000028530(PRKACB);ENSGALG00000005198(RPS6KB1);ENSGALG00000032366(MEF2A);ENSGALG00000027629(GNG2);ENSGALG00000007687(MAP2K1);ENSGALG00000038096(NOS2);ENSGALG00000008907(PLCB4);ENSGALG00000041700(GNAI3);ENSGALG00000003939(KLF2);ENSGALG00000003208(GABARAPL2);ENSGALG00000015082(RPS6);ENSGALG00000005998(RRAS2);ENSGALG00000006035(PDE3B);ENSGALG00000001334(GNB1);ENSGALG00000054458(AKT2);ENSGALG…	K04345+K04688+K09260+K07826+K04368+K13241+K05858+K04630+K17845+K08341+K02991+K07830+K13296+K04536+K04456+K04500+K04639+K00914+K07203+K02183+K04503+K02183+K04630+K04630+K08047+K04366+K08341+K12313+K04960
Organismal Systems	Immune system	NOD-like receptor signaling pathway	31	122	0.0303479	0.475	ko04621	ENSGALG00000004519(TRPV2);ENSGALG00000043535(RIPK2);ENSGALG00000008491(XIAP);ENSGALG00000012356(TAB2);ENSGALG00000006503(VDAC1);ENSGALG00000002345(ATG12);ENSGALG00000003863(P2RX7);ENSGALG00000012304(NFKB1);ENSGALG00000008907(PLCB4);ENSGALG00000009840(TBK1);ENSGALG00000041463(VDAC3);ENSGALG00000041129(TMEM173);ENSGALG00000003208(GABARAPL2);ENSGALG00000013356(IKBKE);ENSGALG00000043603(CCL5);ENSGALG…	K04971+K08846+K04725+K04404+K05862+K08336+K05220+K02580+K05858+K05410+K15041+K12654+K08341+K07211+K12499+K05131+K04734+K11864+K21356+K09849+K20909+K12650+K12793+K03175+K04513+K04079+K03174+K03462+K08341+K04440+K04960
Metabolism	Carbohydrate metabolism	Pyruvate metabolism	10	31	0.0443411	0.607	ko00620	ENSGALG00000017163(ACAT1);ENSGALG00000011659(ACAT2);ENSGALG00000008858(MDH1);ENSGALG00000029576(PDHB);ENSGALG00000035836(LDHB);ENSGALG00000006300(LDHA);ENSGALG00000001949(MDH2);ENSGALG00000005398(HAGH);ENSGALG00000010127(GLO1);ENSGALG00000016430(PDHA1)	K00626+K00626+K00025+K00162+K00016+K00016+K00026+K01069+K01759+K00161
Cellular Processes	Cell growth and death	Apoptosis	30	121	0.0443636	0.607	ko04210	ENSGALG00000034473(PARP4);ENSGALG00000006511(BCL2A1);ENSGALG00000008491(XIAP);ENSGALG00000014786(PIK3R1);ENSGALG00000011020(CYCS);ENSGALG00000007462(CTSZ);ENSGALG00000007687(MAP2K1);ENSGALG00000012304(NFKB1);ENSGALG00000008713(BIRC5);ENSGALG00000008240(CFLAR);ENSGALG00000009565(EIF2S1);ENSGALG00000004252(-);ENSGALG00000027864(NFKBIA);ENSGALG00000054458(AKT2);ENSGALG00000009621(ACTB);ENSGALG000000…	K10798+K02162+K04725+K02649+K08738+K08568+K04368+K02580+K08731+K04724+K03237+K01365+K04734+K04456+K05692+K04389+K04402+K04379+K00922+K01365+K04402+K04374+K06114+K07374+K04366+K04440+K04390+K08860+K08669+K04960
Cellular Processes	Cell motility	Regulation of actin cytoskeleton	43	186	0.0549027	0.707	ko04810	ENSGALG00000017153(RDX);ENSGALG00000010770(SCIN);ENSGALG00000006426(PAK2);ENSGALG00000008797(WASL);ENSGALG00000040016(PPP1CA);ENSGALG00000014786(PIK3R1);ENSGALG00000006691(ARPC4);ENSGALG00000007511(ITGB2);ENSGALG00000007687(MAP2K1);ENSGALG00000003820(ARPC3);ENSGALG00000031009(ARHGEF7);ENSGALG00000050875(ITGB7);ENSGALG00000003642(PDGFA);ENSGALG00000004571(PPP1CC);ENSGALG00000008714(ABI2);ENSGALG00…	K05762+K05768+K04410+K05747+K06269+K02649+K05755+K06464+K04368+K05756+K13710+K06590+K04359+K06269+K05751+K05730+K04358+K07861+K07830+K05743+K06485+K05692+K12757+K12757+K05757+K04639+K04514+K00922+K05729+K05754+K06269+K05741+K05719+K07860+K04513+K05758+K05759+K05766+K04366+K04393+K05769+K05722+K05764
Cellular Processes	Cell growth and death	Oocyte meiosis	24	96	0.0616997	0.751	ko04114	ENSGALG00000040005(PPP2R5D);ENSGALG00000040016(PPP1CA);ENSGALG00000028530(PRKACB);ENSGALG00000040651(IGF1R);ENSGALG00000013607(FBXO5);ENSGALG00000006462(PPP2CA);ENSGALG00000023648(PPP3R1);ENSGALG00000031387(YWHAZ);ENSGALG00000007687(MAP2K1);ENSGALG00000004571(PPP1CC);ENSGALG00000028643(ANAPC10);ENSGALG00000002229(FBXW11);ENSGALG00000001506(PTTG2);ENSGALG00000033512(CPEB4);ENSGALG00000036941(CUL1)…	K11584+K06269+K04345+K05087+K10292+K04382+K06268+K16197+K04368+K06269+K03357+K03362+K06635+K02602+K03347+K16198+K16197+K03868+K02183+K06269+K02183+K06630+K08047+K04960
Genetic Information Processing	Transcription	RNA polymerase	8	25	0.07169	0.807	ko03020	ENSGALG00000010863(TWISTNB);ENSGALG00000036019(POLR2K);ENSGALG00000032273(POLR1B);ENSGALG00000038595(POLR2I);ENSGALG00000008534(POLR2H);ENSGALG00000002057(POLR2D);ENSGALG00000004947(POLR3A);ENSGALG00000012291(POLR2F)	K03004+K03009+K03002+K03017+K03016+K03012+K03018+K03014
Genetic Information Processing	Replication and repair	Nucleotide excision repair	11	38	0.0737322	0.807	ko03420	ENSGALG00000006357(XPC);ENSGALG00000014790(CDK7);ENSGALG00000029292(PCNA);ENSGALG00000028998(XPA);ENSGALG00000002399(-);ENSGALG00000029449(RFC2);ENSGALG00000011993(RBX1);ENSGALG00000000734(RPA4);ENSGALG00000026517(RFC5);ENSGALG00000006254(ERCC6);ENSGALG00000011910(MNAT1)	K10838+K02202+K04802+K10847+K03142+K10755+K03868+K10739+K10756+K10841+K10842
Environmental Information Processing	Signal transduction	cGMP - PKG signaling pathway	3	6	0.0793031	0.827	ko04022	MSTRG.21600(Itpr3);MSTRG.30832(sesB);MSTRG.5032(Irs2)	K04960+K05863+K07187
Human Diseases	Infectious diseases	Influenza A	31	133	0.0847206	0.84	ko05164	ENSGALG00000008092(NXT2);ENSGALG00000014786(PIK3R1);ENSGALG00000006503(VDAC1);ENSGALG00000011020(CYCS);ENSGALG00000007687(MAP2K1);ENSGALG00000007653(RAE1);ENSGALG00000012304(NFKB1);ENSGALG00000009840(TBK1);ENSGALG00000009903(IFNG);ENSGALG00000009565(EIF2S1);ENSGALG00000013356(IKBKE);ENSGALG00000043603(CCL5);ENSGALG00000006512(HSPA8);ENSGALG00000041867(IFNAR2);ENSGALG00000027864(NFKBIA);ENSGALG000…	K14285+K02649+K05862+K08738+K04368+K14298+K02580+K05410+K04687+K03237+K07211+K12499+K03283+K05131+K04734+K05133+K04456+K05692+K04389+K06752+K00922+K06752+K04433+K06752+K04366+K04440+K04390+K08860+K03083+K05863+K05863
Human Diseases	Neurodegenerative diseases	Parkinson disease	2	3	0.0884074	0.84	ko05012	MSTRG.28953(--);MSTRG.30832(sesB)	K03967+K05863
Organismal Systems	Immune system	RIG-I-like receptor signaling pathway	14	53	0.0920496	0.84	ko04622	ENSGALG00000014718(MAP3K1);ENSGALG00000002345(ATG12);ENSGALG00000012304(NFKB1);ENSGALG00000042890(PIN1);ENSGALG00000009840(TBK1);ENSGALG00000041129(TMEM173);ENSGALG00000013356(IKBKE);ENSGALG00000027864(NFKBIA);ENSGALG00000002147(SIKE1);ENSGALG00000011131(TANK);ENSGALG00000016231(DDX3X);ENSGALG00000007932(TRAF6);ENSGALG00000011389(TRAF3);ENSGALG00000006109(MAPK8)	K04416+K08336+K02580+K09578+K05410+K12654+K07211+K04734+K12656+K12650+K11594+K03175+K03174+K04440
Organismal Systems	Endocrine system	Insulin signaling pathway	28	120	0.0965876	0.846	ko04910	ENSGALG00000008107(IRS4);ENSGALG00000040016(PPP1CA);ENSGALG00000028530(PRKACB);ENSGALG00000014786(PIK3R1);ENSGALG00000003712(RAPGEF1);ENSGALG00000005198(RPS6KB1);ENSGALG00000007023(PRKAR2A);ENSGALG00000042112(EIF4E);ENSGALG00000007687(MAP2K1);ENSGALG00000003205(EIF4EBP1);ENSGALG00000004571(PPP1CC);ENSGALG00000015082(RPS6);ENSGALG00000040896(FASN);ENSGALG00000006035(PDE3B);ENSGALG00000054458(AKT2)…	K07187+K06269+K04345+K02649+K06277+K04688+K04739+K03259+K04368+K07205+K06269+K02991+K00665+K13296+K04456+K04739+K00922+K03841+K07203+K02183+K06269+K02183+K07201+K04366+K04440+K03083+K07190+K07187
Cellular Processes	Transport and catabolism	Autophagy - other eukaryotes	8	27	0.105482	0.857	ko04136	ENSGALG00000008282(ATG4A);ENSGALG00000006462(PPP2CA);ENSGALG00000002345(ATG12);ENSGALG00000003208(GABARAPL2);ENSGALG00000035773(PIK3C3);ENSGALG00000003339(MTOR);ENSGALG00000042088(ATG2B);ENSGALG00000014723(GABARAPL1)	K08342+K04382+K08336+K08341+K00914+K07203+K17906+K08341
Cellular Processes	Transport and catabolism	Phagosome	28	122	0.113328	0.857	ko04145	ENSGALG00000007224(HGS);ENSGALG00000005902(RAB7A);ENSGALG00000008836(ATP6AP1);ENSGALG00000008572(LAMP2);ENSGALG00000007511(ITGB2);ENSGALG00000010091(ATP6V0B);ENSGALG00000037697(LAMP1);ENSGALG00000003256(ATP6V0A1);ENSGALG00000013036(ATP6V1E1);ENSGALG00000004252(-);ENSGALG00000007485(TFR2);ENSGALG00000009621(ACTB);ENSGALG00000039704(SEC22B);ENSGALG00000000141(BLB1);ENSGALG00000033932(BF1);ENSGALG00…	K12182+K07897+K03662+K06528+K06464+K03661+K06528+K02154+K02150+K01365+K06503+K05692+K08517+K06752+K06751+K06752+K06752+K01365+K00914+K06751+K02146+K02152+K05719+K13883+K07375+K07375+K07374+K02145
Cellular Processes	Transport and catabolism	Endocytosis	48	222	0.114399	0.857	ko04144	ENSGALG00000012879(VPS4B);ENSGALG00000007224(HGS);ENSGALG00000041795(WWP1);ENSGALG00000005902(RAB7A);ENSGALG00000008797(WASL);ENSGALG00000012513(STAM2);ENSGALG00000001309(SNF8);ENSGALG00000011621(IGF2R);ENSGALG00000029706(RUFY1);ENSGALG00000034803(-);ENSGALG00000040651(IGF1R);ENSGALG00000006691(ARPC4);ENSGALG00000041277(UBC);ENSGALG00000007615(RAB11A);ENSGALG00000003820(ARPC3);ENSGALG00000002800(…	K12196+K12182+K05633+K07897+K05747+K04705+K12188+K06564+K12482+K11981+K05087+K05755+K04551+K07904+K05756+K00909+K12197+K12186+K04388+K12489+K12472+K04180+K04180+K06503+K07937+K03283+K12200+K17917+K12194+K05757+K05070+K04500+K18467+K06751+K18466+K06751+K10365+K05754+K12492+K03175+K04513+K05758+K12562+K08291+K07905+K12470+K04393+K07879
Organismal Systems	Immune system	Cytosolic DNA-sensing pathway	11	41	0.115727	0.857	ko04623	ENSGALG00000036019(POLR2K);ENSGALG00000012304(NFKB1);ENSGALG00000009840(TBK1);ENSGALG00000041129(TMEM173);ENSGALG00000013356(IKBKE);ENSGALG00000032717(CCL4);ENSGALG00000043603(CCL5);ENSGALG00000027864(NFKBIA);ENSGALG00000008534(POLR2H);ENSGALG00000004947(POLR3A);ENSGALG00000012291(POLR2F)	K03009+K02580+K05410+K12654+K07211+K12964+K12499+K04734+K03016+K03018+K03014
Organismal Systems	Environmental adaptation	Thermogenesis	3	7	0.120372	0.857	ko04714	MSTRG.20179(Arid1a);MSTRG.22132(Coa3);MSTRG.28953(--)	K11653+K18175+K03967
Genetic Information Processing	Translation	Ribosome biogenesis in eukaryotes	16	65	0.125147	0.857	ko03008	ENSGALG00000041972(POP4);ENSGALG00000029152(IMP4);ENSGALG00000020534(AK6);ENSGALG00000012916(DROSHA);ENSGALG00000008092(NXT2);ENSGALG00000002569(RAN);ENSGALG00000008454(NOP58);ENSGALG00000000693(NOB1);ENSGALG00000005054(DKC1);ENSGALG00000038723(RPP25L);ENSGALG00000005558(TBL3);ENSGALG00000000247(WDR36);ENSGALG00000036074(RPP40);ENSGALG00000008794(RPP38);ENSGALG00000008372(XRN2);ENSGALG00000006486…	K03538+K14561+K18532+K03685+K14285+K07936+K14565+K11883+K11131+K14525+K14555+K14554+K14530+K14523+K12619+K03539
Metabolism	Carbohydrate metabolism	Citrate cycle (TCA cycle)	8	28	0.125169	0.857	ko00020	ENSGALG00000033888(IDH3B);ENSGALG00000008858(MDH1);ENSGALG00000029576(PDHB);ENSGALG00000008818(IDH1);ENSGALG00000054449(SDHC);ENSGALG00000001949(MDH2);ENSGALG00000011950(ACO2);ENSGALG00000016430(PDHA1)	K00030+K00025+K00162+K00031+K00236+K00026+K01681+K00161
Genetic Information Processing	Folding, sorting and degradation	Protein export	7	24	0.134525	0.88	ko03060	ENSGALG00000001000(HSPA5);ENSGALG00000002062(SRP68);ENSGALG00000037553(SEC11A);ENSGALG00000023135(SRP54);ENSGALG00000009379(SEC62);ENSGALG00000000218(SRP19);MSTRG.39348(Oxa1l)	K09490+K03107+K13280+K03106+K12275+K03105+K03217
Genetic Information Processing	Replication and repair	Mismatch repair	6	20	0.144274	0.88	ko03430	ENSGALG00000008962(MSH2);ENSGALG00000029292(PCNA);ENSGALG00000012876(SSBP1);ENSGALG00000029449(RFC2);ENSGALG00000000734(RPA4);ENSGALG00000026517(RFC5)	K08735+K04802+K03111+K10755+K10739+K10756
Organismal Systems	Immune system	Toll-like receptor signaling pathway	19	81	0.145346	0.88	ko04620	ENSGALG00000014786(PIK3R1);ENSGALG00000012356(TAB2);ENSGALG00000007687(MAP2K1);ENSGALG00000012304(NFKB1);ENSGALG00000009840(TBK1);ENSGALG00000013356(IKBKE);ENSGALG00000032717(CCL4);ENSGALG00000043603(CCL5);ENSGALG00000041867(IFNAR2);ENSGALG00000027864(NFKBIA);ENSGALG00000054458(AKT2);ENSGALG00000006697(TOLLIP);ENSGALG00000028037(FOS);ENSGALG00000002583(PIK3CD);ENSGALG00000004370(MAP2K6);ENSGALG00…	K02649+K04404+K04368+K02580+K05410+K07211+K12964+K12499+K05131+K04734+K04456+K05402+K04379+K00922+K04433+K04415+K03175+K03174+K04440
Metabolism	Global and overview maps	Fatty acid metabolism	11	43	0.149926	0.88	ko01212	ENSGALG00000017163(ACAT1);ENSGALG00000011659(ACAT2);ENSGALG00000005206(ACSL3);ENSGALG00000010681(CPT2);ENSGALG00000040896(FASN);ENSGALG00000016124(HADH);ENSGALG00000034275(MCAT);ENSGALG00000034502(SCD5);ENSGALG00000011704(HACD2);ENSGALG00000016314(ELOVL5);ENSGALG00000002891(ACADL)	K00626+K00626+K01897+K08766+K00665+K00022+K00645+K00507+K10703+K10244+K00255
Cellular Processes	Cell growth and death	Cell cycle	25	111	0.15125	0.88	ko04110	ENSGALG00000014790(CDK7);ENSGALG00000029292(PCNA);ENSGALG00000031387(YWHAZ);ENSGALG00000025759(TFDP2);ENSGALG00000029523(RAD21);ENSGALG00000028318(CDKN1A);ENSGALG00000009681(BUB3);ENSGALG00000028643(ANAPC10);ENSGALG00000033631(MYC);ENSGALG00000005769(WEE1);ENSGALG00000001506(PTTG2);ENSGALG00000035116(-);ENSGALG00000036001(SMAD2Z);ENSGALG00000025977(GADD45A);ENSGALG00000036941(CUL1);ENSGALG0000001…	K02202+K04802+K16197+K09392+K06670+K06625+K02180+K03357+K04377+K06632+K06635+K06671+K04500+K04402+K03347+K16198+K16197+K04402+K03868+K04503+K06630+K06639+K03364+K03083+K02542
Organismal Systems	Nervous system	Retrograde endocannabinoid signaling	2	4	0.155622	0.88	ko04723	MSTRG.21600(Itpr3);MSTRG.28953(--)	K04960+K03967
Cellular Processes	Cell growth and death	Necroptosis	28	127	0.162716	0.88	ko04217	ENSGALG00000034473(PARP4);ENSGALG00000012879(VPS4B);ENSGALG00000008491(XIAP);ENSGALG00000006503(VDAC1);ENSGALG00000006161(CHMP1A);ENSGALG00000008240(CFLAR);ENSGALG00000009903(IFNG);ENSGALG00000041463(VDAC3);ENSGALG00000034735(-);ENSGALG00000033447(H2AFV);ENSGALG00000028600(PPIA);ENSGALG00000041867(IFNAR2);ENSGALG00000032660(IFNGR2);ENSGALG00000002095(CHMP4B);ENSGALG00000003076(FASLG);ENSGALG00000…	K10798+K12196+K04725+K05862+K12197+K04724+K04687+K15041+K00261+K11251+K03767+K05131+K05133+K12194+K04389+K11251+K11251+K11251+K11251+K11251+K09849+K00522+K10802+K04079+K04440+K04390+K05863+K05863
Organismal Systems	Immune system	Th1 and Th2 cell differentiation	4	12	0.162744	0.88	ko04658	MSTRG.10184(Maml1);MSTRG.12843(--);MSTRG.21689(TRAV1-2);MSTRG.31586(--)	K06061+K06053+K10784+K06053
Organismal Systems	Endocrine system	Progesterone-mediated oocyte maturation	18	78	0.171153	0.88	ko04914	ENSGALG00000028530(PRKACB);ENSGALG00000014786(PIK3R1);ENSGALG00000040651(IGF1R);ENSGALG00000007687(MAP2K1);ENSGALG00000041700(GNAI3);ENSGALG00000028643(ANAPC10);ENSGALG00000006035(PDE3B);ENSGALG00000054458(AKT2);ENSGALG00000002816(STK10);ENSGALG00000033512(CPEB4);ENSGALG00000002583(PIK3CD);ENSGALG00000008382(GNAI1);ENSGALG00000035645(GNAI2);ENSGALG00000003837(ADCY7);ENSGALG00000033212(HSP90AA1);E…	K04345+K02649+K05087+K04368+K04630+K03357+K13296+K04456+K08837+K02602+K00922+K04630+K04630+K08047+K04079+K04366+K03364+K04440
Human Diseases	Immune diseases	Asthma	1	1	0.183287	0.88	ko05310	MSTRG.21689(TRAV1-2)	K10784
Metabolism	Carbohydrate metabolism	Pentose phosphate pathway	7	26	0.185236	0.88	ko00030	ENSGALG00000004956(GPI);ENSGALG00000013095(DERA);ENSGALG00000004908(-);ENSGALG00000011016(PGM1);ENSGALG00000039394(PGM2);ENSGALG00000012613(FBP1);ENSGALG00000005309(TKT)	K01810+K01619+K00948+K01835+K15779+K03841+K00615
Genetic Information Processing	Replication and repair	DNA replication	8	31	0.194375	0.88	ko03030	ENSGALG00000016389(RNASEH1);ENSGALG00000029292(PCNA);ENSGALG00000012876(SSBP1);ENSGALG00000029449(RFC2);ENSGALG00000017015(RNASEH2B);ENSGALG00000000734(RPA4);ENSGALG00000026517(RFC5);ENSGALG00000012348(MCM6)	K03469+K04802+K03111+K10755+K10744+K10739+K10756+K02542
Metabolism	Global and overview maps	2-Oxocarboxylic acid metabolism	4	13	0.202894	0.88	ko01210	ENSGALG00000033888(IDH3B);ENSGALG00000008818(IDH1);ENSGALG00000011950(ACO2);ENSGALG00000002321(GOT2)	K00030+K00031+K01681+K14455
Metabolism	Glycan biosynthesis and metabolism	N-Glycan biosynthesis	11	46	0.209675	0.88	ko00510	ENSGALG00000022891(B4GALT3);ENSGALG00000039791(DOLPP1);ENSGALG00000005907(RPN1);ENSGALG00000030780(MGAT4A);ENSGALG00000010094(B4GALT2);ENSGALG00000019042(ALG8);ENSGALG00000032420(DPAGT1);ENSGALG00000011465(STT3B);ENSGALG00000042730(STT3A);ENSGALG00000003815(RPN2);ENSGALG00000017049(ALG5)	K07968+K07252+K12666+K00738+K07967+K03849+K01001+K07151+K07151+K12667+K00729
Human Diseases	Endocrine and metabolic diseases	Non-alcoholic fatty liver disease (NAFLD)	2	5	0.228839	0.88	ko04932	MSTRG.28953(--);MSTRG.5032(Irs2)	K03967+K07187
Cellular Processes	Cellular community - eukaryotes	Adherens junction	15	67	0.235044	0.88	ko04520	ENSGALG00000008797(WASL);ENSGALG00000040651(IGF1R);ENSGALG00000006480(TCF7);ENSGALG00000008018(SNAI1);ENSGALG00000011442(TGFBR2);ENSGALG00000010049(PTPRB);ENSGALG00000040606(RAC3);ENSGALG00000015022(FYN);ENSGALG00000009621(ACTB);ENSGALG00000031960(LEF1);ENSGALG00000036001(SMAD2Z);ENSGALG00000012456(RAC2);ENSGALG00000003806(RHOA);ENSGALG00000014561(PTPN6);ENSGALG00000004796(CDC42)	K05747+K05087+K02620+K05706+K04388+K05694+K07861+K05703+K05692+K04492+K04500+K07860+K04513+K05697+K04393
Metabolism	Glycan biosynthesis and metabolism	Glycosaminoglycan biosynthesis - keratan sulfate	4	14	0.24554	0.88	ko00533	ENSGALG00000015069(B4GALT4);ENSGALG00000022891(B4GALT3);ENSGALG00000008930(B3GNT2);ENSGALG00000010094(B4GALT2)	K07969+K07968+K00741+K07967
Metabolism	Metabolism of other amino acids	Selenocompound metabolism	4	15	0.289886	0.88	ko00450	ENSGALG00000035345(TXNRD1);ENSGALG00000039363(TXNRD3);ENSGALG00000004019(MARS2);ENSGALG00000030194(SCLY)	K22182+K22182+K01874+K01763
Environmental Information Processing	Signaling molecules and interaction	Cell adhesion molecules (CAMs)	22	106	0.293123	0.88	ko04514	ENSGALG00000007511(ITGB2);ENSGALG00000015348(ALCAM);ENSGALG00000030040(CDH15);ENSGALG00000050875(ITGB7);ENSGALG00000053667(-);ENSGALG00000008656(ICOS);ENSGALG00000008669(CD28);ENSGALG00000013748(CD226);ENSGALG00000034007(ITGA6);ENSGALG00000046125(PECAM1);ENSGALG00000000141(BLB1);ENSGALG00000033932(BF1);ENSGALG00000030940(BLB2);ENSGALG00000000158(MHCDMA);ENSGALG00000041380(BF2);ENSGALG00000007145(…	K06464+K06547+K06809+K06590+K06449+K06713+K06470+K06567+K06485+K06471+K06752+K06751+K06752+K06752+K06751+K05719+K06454+K06458+K06458+K06459+K06520+K10784
Metabolism	Metabolism of terpenoids and polyketides	Terpenoid backbone biosynthesis	5	20	0.298366	0.88	ko00900	ENSGALG00000017163(ACAT1);ENSGALG00000011659(ACAT2);ENSGALG00000015313(PDSS2);ENSGALG00000000855(ZMPSTE24);MSTRG.25385(--)	K00626+K00626+K12505+K06013+K12505
Metabolism	Metabolism of cofactors and vitamins	Riboflavin metabolism	2	6	0.303607	0.88	ko00740	ENSGALG00000016363(ACP1);ENSGALG00000054345(RFKL)	K14394+K00861
Organismal Systems	Digestive system	Gastric acid secretion	2	6	0.303607	0.88	ko04971	MSTRG.21600(Itpr3);MSTRG.4856(SLC9A4)	K04960+K13961
Human Diseases	Neurodegenerative diseases	Huntington disease	2	6	0.303607	0.88	ko05016	MSTRG.28953(--);MSTRG.30832(sesB)	K03967+K05863
Human Diseases	Infectious diseases	HTLV-I infection	2	6	0.303607	0.88	ko05166	MSTRG.21689(TRAV1-2);MSTRG.30832(sesB)	K10784+K05863
Organismal Systems	Immune system	Intestinal immune network for IgA production	9	40	0.304356	0.88	ko04672	ENSGALG00000011849(IL2);ENSGALG00000016852(TNFSF13B);ENSGALG00000050875(ITGB7);ENSGALG00000008656(ICOS);ENSGALG00000008669(CD28);ENSGALG00000000141(BLB1);ENSGALG00000030940(BLB2);ENSGALG00000000158(MHCDMA);MSTRG.21689(TRAV1-2)	K05429+K05476+K06590+K06713+K06470+K06752+K06752+K06752+K10784
Genetic Information Processing	Folding, sorting and degradation	SNARE interactions in vesicular transport	7	30	0.304397	0.88	ko04130	ENSGALG00000011673(STX11);ENSGALG00000002536(STX2);ENSGALG00000039704(SEC22B);ENSGALG00000031381(VAMP4);ENSGALG00000002882(BNIP1);ENSGALG00000007476(VAMP7);ENSGALG00000049853(VAMP1)	K08487+K08486+K08517+K08513+K08497+K08515+K08510
Genetic Information Processing	Folding, sorting and degradation	RNA degradation	14	66	0.317245	0.88	ko03018	ENSGALG00000040373(EXOSC2);ENSGALG00000008765(C1D);ENSGALG00000031983(MPHOSPH6);ENSGALG00000007643(DIS3L);ENSGALG00000003245(LSM1);ENSGALG00000031512(PAN2);ENSGALG00000003385(-);ENSGALG00000031143(DCPS);ENSGALG00000041625(LSM5);ENSGALG00000040181(EDC3);ENSGALG00000052763(BTG2);ENSGALG00000011957(TOB2);ENSGALG00000003950(CNOT8);ENSGALG00000008372(XRN2)	K03679+K12592+K12593+K18681+K12620+K12571+K12623+K12584+K12624+K12615+K14443+K14443+K12581+K12619
Organismal Systems	Aging	Longevity regulating pathway - mammal	1	2	0.333012	0.88	ko04211	MSTRG.5032(Irs2)	K07187
Organismal Systems	Immune system	Antigen processing and presentation	1	2	0.333012	0.88	ko04612	MSTRG.21689(TRAV1-2)	K10784
Organismal Systems	Nervous system	Long-term potentiation	1	2	0.333012	0.88	ko04720	MSTRG.21600(Itpr3)	K04960
Organismal Systems	Nervous system	Cholinergic synapse	1	2	0.333012	0.88	ko04725	MSTRG.21600(Itpr3)	K04960
Organismal Systems	Endocrine system	Estrogen signaling pathway	1	2	0.333012	0.88	ko04915	MSTRG.21600(Itpr3)	K04960
Organismal Systems	Endocrine system	Thyroid hormone synthesis	1	2	0.333012	0.88	ko04918	MSTRG.21600(Itpr3)	K04960
Organismal Systems	Endocrine system	Regulation of lipolysis in adipocyte	1	2	0.333012	0.88	ko04923	MSTRG.5032(Irs2)	K07187
Organismal Systems	Endocrine system	Aldosterone synthesis and secretion	1	2	0.333012	0.88	ko04925	MSTRG.21600(Itpr3)	K04960
Organismal Systems	Endocrine system	Cortisol synthesis and secretion	1	2	0.333012	0.88	ko04927	MSTRG.21600(Itpr3)	K04960
Human Diseases	Endocrine and metabolic diseases	Type II diabetes mellitus	1	2	0.333012	0.88	ko04930	MSTRG.5032(Irs2)	K07187
Human Diseases	Endocrine and metabolic diseases	Cushing syndrome	1	2	0.333012	0.88	ko04934	MSTRG.21600(Itpr3)	K04960
Human Diseases	Endocrine and metabolic diseases	Type I diabetes mellitus	1	2	0.333012	0.88	ko04940	MSTRG.21689(TRAV1-2)	K10784
Organismal Systems	Digestive system	Salivary secretion	1	2	0.333012	0.88	ko04970	MSTRG.21600(Itpr3)	K04960
Organismal Systems	Digestive system	Pancreatic secretion	1	2	0.333012	0.88	ko04972	MSTRG.21600(Itpr3)	K04960
Human Diseases	Infectious diseases	Chagas disease (American trypanosomiasis)	1	2	0.333012	0.88	ko05142	MSTRG.21689(TRAV1-2)	K10784
Human Diseases	Infectious diseases	Malaria	1	2	0.333012	0.88	ko05144	MSTRG.21689(TRAV1-2)	K10784
Human Diseases	Infectious diseases	Staphylococcus aureus infection	1	2	0.333012	0.88	ko05150	MSTRG.21689(TRAV1-2)	K10784
Human Diseases	Infectious diseases	Measles	1	2	0.333012	0.88	ko05162	MSTRG.21689(TRAV1-2)	K10784
Human Diseases	Immune diseases	Autoimmune thyroid disease	1	2	0.333012	0.88	ko05320	MSTRG.21689(TRAV1-2)	K10784
Human Diseases	Immune diseases	Systemic lupus erythematosus	1	2	0.333012	0.88	ko05322	MSTRG.21689(TRAV1-2)	K10784
Human Diseases	Immune diseases	Allograft rejection	1	2	0.333012	0.88	ko05330	MSTRG.21689(TRAV1-2)	K10784
Human Diseases	Immune diseases	Graft-versus-host disease	1	2	0.333012	0.88	ko05332	MSTRG.21689(TRAV1-2)	K10784
Human Diseases	Cardiovascular diseases	Viral myocarditis	1	2	0.333012	0.88	ko05416	MSTRG.21689(TRAV1-2)	K10784
Metabolism	Lipid metabolism	Fatty acid degradation	7	31	0.336487	0.88	ko00071	ENSGALG00000017163(ACAT1);ENSGALG00000011659(ACAT2);ENSGALG00000005206(ACSL3);ENSGALG00000010681(CPT2);ENSGALG00000016124(HADH);ENSGALG00000012809(ECI2);ENSGALG00000002891(ACADL)	K00626+K00626+K01897+K08766+K00022+K13239+K00255
Metabolism	Metabolism of cofactors and vitamins	Porphyrin and chlorophyll metabolism	5	21	0.337708	0.88	ko00860	ENSGALG00000010219(UROD);ENSGALG00000009598(EPRS);ENSGALG00000003948(ALAS2);ENSGALG00000005571(HCCS);ENSGALG00000007638(HMOX2)	K01599+K14163+K00643+K01764+K21418
Cellular Processes	Cell growth and death	p53 signaling pathway	13	62	0.343004	0.884	ko04115	ENSGALG00000038217(CD82);ENSGALG00000017204(SESN3);ENSGALG00000011020(CYCS);ENSGALG00000016502(TP53I3);ENSGALG00000028318(CDKN1A);ENSGALG00000038097(EI24);ENSGALG00000001718(CCNG1);ENSGALG00000003634(PTEN);ENSGALG00000025977(GADD45A);ENSGALG00000028005(GADD45G);ENSGALG00000007555(CCND1);ENSGALG00000011619(SIVA1);ENSGALG00000006351(FAS)	K06509+K10141+K08738+K10133+K06625+K10134+K10145+K01110+K04402+K04402+K04503+K22744+K04390
Environmental Information Processing	Signal transduction	Hedgehog signaling pathway	9	42	0.360096	0.917	ko04340	ENSGALG00000009939(SPOP);ENSGALG00000028530(PRKACB);ENSGALG00000005108(CUL3);ENSGALG00000002229(FBXW11);ENSGALG00000002719(CSNK1D);ENSGALG00000001364(CSNK1A1L);ENSGALG00000036941(CUL1);ENSGALG00000007555(CCND1);ENSGALG00000014977(GSK3B)	K10523+K04345+K03869+K03362+K08959+K08957+K03347+K04503+K03083
Environmental Information Processing	Signal transduction	Phosphatidylinositol signaling system	19	95	0.375989	0.923	ko04070	ENSGALG00000034487(IMPA1);ENSGALG00000007590(MTMR8);ENSGALG00000005701(IP6K2);ENSGALG00000014786(PIK3R1);ENSGALG00000030406(CDS2);ENSGALG00000033507(PLCG2);ENSGALG00000009068(ITPKB);ENSGALG00000008907(PLCB4);ENSGALG00000005805(PLCD1);ENSGALG00000003634(PTEN);ENSGALG00000001730(DGKD);ENSGALG00000002583(PIK3CD);ENSGALG00000035773(PIK3C3);ENSGALG00000031538(PI4K2B);ENSGALG00000010023(CALM2);ENSGALG0…	K01092+K18083+K07756+K02649+K00981+K05859+K00911+K05858+K05857+K01110+K00901+K00922+K00914+K13711+K02183+K02183+K01106+K01099+K04960
Organismal Systems	Endocrine system	Glucagon signaling pathway	2	7	0.376901	0.923	ko04922	MSTRG.16087(--);MSTRG.21600(Itpr3)	K07190+K04960
Metabolism	Lipid metabolism	Fatty acid biosynthesis	3	12	0.382003	0.923	ko00061	ENSGALG00000005206(ACSL3);ENSGALG00000040896(FASN);ENSGALG00000034275(MCAT)	K01897+K00665+K00645
Genetic Information Processing	Translation	Aminoacyl-tRNA biosynthesis	9	43	0.388433	0.923	ko00970	ENSGALG00000005236(FARSB);ENSGALG00000017262(NARS2);ENSGALG00000035080(HARS);ENSGALG00000010789(PARS2);ENSGALG00000004019(MARS2);ENSGALG00000009566(IARS2);ENSGALG00000009598(EPRS);ENSGALG00000011228(WARS);ENSGALG00000012355(DARS)	K01890+K01893+K01892+K01881+K01874+K01870+K14163+K01867+K22503
Cellular Processes	Cell growth and death	Ferroptosis	7	33	0.401684	0.923	ko04216	ENSGALG00000005206(ACSL3);ENSGALG00000041463(VDAC3);ENSGALG00000041030(PCBP2);ENSGALG00000002066(NCOA4);ENSGALG00000007485(TFR2);ENSGALG00000007220(FTH1);ENSGALG00000016313(GCLC)	K01897+K15041+K13162+K09289+K06503+K00522+K11204
Organismal Systems	Circulatory system	Adrenergic signaling in cardiomyocytes	23	118	0.407821	0.923	ko04261	ENSGALG00000040005(PPP2R5D);ENSGALG00000040016(PPP1CA);ENSGALG00000028530(PRKACB);ENSGALG00000015233(ATP1B1);ENSGALG00000006462(PPP2CA);ENSGALG00000030859(GNAS);ENSGALG00000002764(ATP1B3);ENSGALG00000008907(PLCB4);ENSGALG00000041700(GNAI3);ENSGALG00000004571(PPP1CC);ENSGALG00000002563(TPM4);ENSGALG00000013537(TPM3);ENSGALG00000010052(PPP2R3C);ENSGALG00000054458(AKT2);ENSGALG00000010023(CALM2);ENS…	K11584+K06269+K04345+K01540+K04382+K04632+K01540+K05858+K04630+K06269+K10375+K09290+K11583+K04456+K02183+K06269+K09052+K04374+K02183+K04445+K04630+K04630+K08047
Metabolism	Amino acid metabolism	Cysteine and methionine metabolism	8	39	0.425183	0.923	ko00270	ENSGALG00000025796(ADI1);ENSGALG00000008858(MDH1);ENSGALG00000035836(LDHB);ENSGALG00000006300(LDHA);ENSGALG00000001949(MDH2);ENSGALG00000002321(GOT2);ENSGALG00000016379(SMS);ENSGALG00000016313(GCLC)	K08967+K00025+K00016+K00016+K00026+K14455+K00802+K11204
Genetic Information Processing	Transcription	Basal transcription factors	8	39	0.425183	0.923	ko03022	ENSGALG00000006205(GTF2B);ENSGALG00000015185(TAF13);ENSGALG00000014790(CDK7);ENSGALG00000002399(-);ENSGALG00000043193(TAF2);ENSGALG00000003498(TAF8);ENSGALG00000011910(MNAT1);MSTRG.6742(TAF10)	K03124+K03127+K02202+K03142+K03128+K14649+K10842+K03134
Genetic Information Processing	Translation	mRNA surveillance pathway	14	71	0.42805	0.923	ko03015	ENSGALG00000040005(PPP2R5D);ENSGALG00000008092(NXT2);ENSGALG00000040016(PPP1CA);ENSGALG00000006462(PPP2CA);ENSGALG00000002087(NCBP1);ENSGALG00000017249(PCF11);ENSGALG00000007757(CSTF1);ENSGALG00000013962(HBS1L);ENSGALG00000004571(PPP1CC);ENSGALG00000013889(RNMT);ENSGALG00000010052(PPP2R3C);ENSGALG00000033772(UPF2);ENSGALG00000010026(PPP1CB);ENSGALG00000001283(SRRM1)	K11584+K14285+K06269+K04382+K12882+K14400+K14406+K14416+K06269+K00565+K11583+K14327+K06269+K13171
Cellular Processes	Cellular community - eukaryotes	Focal adhesion	34	179	0.438393	0.923	ko04510	ENSGALG00000006426(PAK2);ENSGALG00000040016(PPP1CA);ENSGALG00000008491(XIAP);ENSGALG00000014786(PIK3R1);ENSGALG00000003712(RAPGEF1);ENSGALG00000040651(IGF1R);ENSGALG00000007687(MAP2K1);ENSGALG00000009927(RAP1B);ENSGALG00000050875(ITGB7);ENSGALG00000003642(PDGFA);ENSGALG00000004571(PPP1CC);ENSGALG00000039327(VAV3);ENSGALG00000040606(RAC3);ENSGALG00000015022(FYN);ENSGALG00000001476(-);ENSGALG000000…	K04410+K06269+K04725+K02649+K06277+K05087+K04368+K07836+K06590+K04359+K06269+K05730+K07861+K05703+K04353+K06485+K04456+K05692+K12757+K12757+K01110+K04514+K00922+K06275+K06269+K04503+K05719+K07860+K04513+K04366+K04393+K05636+K04440+K03083
Environmental Information Processing	Signal transduction	mTOR signaling pathway	25	131	0.446452	0.923	ko04150	ENSGALG00000041226(RRAGB);ENSGALG00000014786(PIK3R1);ENSGALG00000005198(RPS6KB1);ENSGALG00000040651(IGF1R);ENSGALG00000006791(TTI1);ENSGALG00000027262(CAB39);ENSGALG00000042112(EIF4E);ENSGALG00000007687(MAP2K1);ENSGALG00000053058(LAMTOR2);ENSGALG00000003205(EIF4EBP1);ENSGALG00000000419(LAMTOR5);ENSGALG00000008419(SEC13);ENSGALG00000013036(ATP6V1E1);ENSGALG00000015082(RPS6);ENSGALG00000054458(AKT2…	K16185+K02649+K04688+K05087+K20403+K08272+K03259+K04368+K20398+K07205+K16344+K14004+K02150+K02991+K04456+K01110+K00922+K20411+K07203+K02152+K04513+K08267+K04366+K02145+K03083
Human Diseases	Neurodegenerative diseases	Alzheimer disease	2	8	0.44675	0.923	ko05010	MSTRG.21600(Itpr3);MSTRG.28953(--)	K04960+K03967
Metabolism	Metabolism of other amino acids	D-Glutamine and D-glutamate metabolism	1	3	0.455315	0.923	ko00471	ENSGALG00000034735(-)	K00261
Metabolism	Metabolism of cofactors and vitamins	Lipoic acid metabolism	1	3	0.455315	0.923	ko00785	ENSGALG00000049929(LIAS)	K03644
Environmental Information Processing	Signal transduction	Rap1 signaling pathway	1	3	0.455315	0.923	ko04015	MSTRG.21689(TRAV1-2)	K10784
Organismal Systems	Aging	Longevity regulating pathway - multiple species	1	3	0.455315	0.923	ko04213	MSTRG.5032(Irs2)	K07187
Organismal Systems	Immune system	Platelet activation	1	3	0.455315	0.923	ko04611	MSTRG.21600(Itpr3)	K04960
Organismal Systems	Environmental adaptation	Circadian entrainment	1	3	0.455315	0.923	ko04713	MSTRG.21600(Itpr3)	K04960
Organismal Systems	Sensory system	Taste transduction	1	3	0.455315	0.923	ko04742	MSTRG.21600(Itpr3)	K04960
Organismal Systems	Endocrine system	Renin secretion	1	3	0.455315	0.923	ko04924	MSTRG.21600(Itpr3)	K04960
Human Diseases	Infectious diseases	Kaposi sarcoma-associated herpesvirus infection	1	3	0.455315	0.923	ko05167	MSTRG.21600(Itpr3)	K04960
Human Diseases	Immune diseases	Rheumatoid arthritis	1	3	0.455315	0.923	ko05323	MSTRG.21689(TRAV1-2)	K10784
Environmental Information Processing	Signal transduction	Notch signaling pathway	10	51	0.462838	0.93	ko04330	ENSGALG00000009320(PSEN1);ENSGALG00000045228(-);ENSGALG00000028015(HES1);ENSGALG00000038515(LFNG);ENSGALG00000002055(HES4);ENSGALG00000039942(CTBP1);ENSGALG00000012075(DTX3L);MSTRG.10184(Maml1);MSTRG.12843(--);MSTRG.31586(--)	K04505+K06056+K06054+K05948+K06054+K04496+K06058+K06061+K06053+K06053
Organismal Systems	Circulatory system	Vascular smooth muscle contraction	19	100	0.471606	0.939	ko04270	ENSGALG00000040016(PPP1CA);ENSGALG00000028530(PRKACB);ENSGALG00000007687(MAP2K1);ENSGALG00000030859(GNAS);ENSGALG00000008907(PLCB4);ENSGALG00000004571(PPP1CC);ENSGALG00000010044(KCNMB4);ENSGALG00000036028(GNA13);ENSGALG00000014922(ROCK1);ENSGALG00000006642(ADORA2A);ENSGALG00000010023(CALM2);ENSGALG00000010026(PPP1CB);ENSGALG00000026445(CALM1);ENSGALG00000003806(RHOA);ENSGALG00000003837(ADCY7);ENS…	K06269+K04345+K04368+K04632+K05858+K06269+K04941+K04639+K04514+K04266+K02183+K06269+K02183+K04513+K08047+K04366+K12313+K18051+K04960
Metabolism	Carbohydrate metabolism	Propanoate metabolism	6	30	0.479579	0.946	ko00640	ENSGALG00000017163(ACAT1);ENSGALG00000011659(ACAT2);ENSGALG00000035836(LDHB);ENSGALG00000006300(LDHA);ENSGALG00000040702(BCKDHB);ENSGALG00000005280(DBT)	K00626+K00626+K00016+K00016+K00167+K09699
Metabolism	Metabolism of cofactors and vitamins	Pantothenate and CoA biosynthesis	3	14	0.487607	0.952	ko00770	ENSGALG00000001895(PANK3);ENSGALG00000006627(UPB1);ENSGALG00000005509(DPYD)	K09680+K01431+K00207
Cellular Processes	Cellular community - eukaryotes	Gap junction	15	81	0.528141	0.952	ko04540	ENSGALG00000028530(PRKACB);ENSGALG00000007687(MAP2K1);ENSGALG00000030859(GNAS);ENSGALG00000008907(PLCB4);ENSGALG00000041700(GNAI3);ENSGALG00000003642(PDGFA);ENSGALG00000002719(CSNK1D);ENSGALG00000008382(GNAI1);ENSGALG00000012821(TUBB2B);ENSGALG00000054420(-);ENSGALG00000006241(-);ENSGALG00000035645(GNAI2);ENSGALG00000003837(ADCY7);ENSGALG00000004998(RAF1);MSTRG.21600(Itpr3)	K04345+K04368+K04632+K05858+K04630+K04359+K08959+K04630+K07375+K07375+K07374+K04630+K08047+K04366+K04960
Metabolism	Glycan biosynthesis and metabolism	Mannose type O-glycan biosyntheis	4	21	0.554362	0.952	ko00515	ENSGALG00000022891(B4GALT3);ENSGALG00000010094(B4GALT2);ENSGALG00000009815(RXYLT1);ENSGALG00000026210(POMK)	K07968+K07967+K21052+K17547
Metabolism	Glycan biosynthesis and metabolism	Glycosaminoglycan biosynthesis - heparan sulfate / heparin	4	21	0.554362	0.952	ko00534	ENSGALG00000012015(NDST4);ENSGALG00000016630(EXTL3);ENSGALG00000034250(HS6ST2);ENSGALG00000002155(HS6ST1)	K02579+K02370+K08102+K02514
Metabolism	Glycan biosynthesis and metabolism	Glycosphingolipid biosynthesis - lacto and neolacto series	4	21	0.554362	0.952	ko00601	ENSGALG00000015069(B4GALT4);ENSGALG00000022891(B4GALT3);ENSGALG00000008930(B3GNT2);ENSGALG00000010094(B4GALT2)	K07969+K07968+K00741+K07967
Organismal Systems	Sensory system	Phototransduction	4	21	0.554362	0.952	ko04744	ENSGALG00000002800(GRK7);ENSGALG00000001334(GNB1);ENSGALG00000010023(CALM2);ENSGALG00000026445(CALM1)	K00909+K04536+K02183+K02183
Environmental Information Processing	Signal transduction	NF-kappa B signaling pathway	1	4	0.555212	0.952	ko04064	MSTRG.21689(TRAV1-2)	K10784
Organismal Systems	Nervous system	Serotonergic synapse	1	4	0.555212	0.952	ko04726	MSTRG.21600(Itpr3)	K04960
Organismal Systems	Endocrine system	Insulin secretion	1	4	0.555212	0.952	ko04911	MSTRG.21600(Itpr3)	K04960
Organismal Systems	Endocrine system	Oxytocin signaling pathway	1	4	0.555212	0.952	ko04921	MSTRG.21600(Itpr3)	K04960
Human Diseases	Infectious diseases	Human cytomegalovirus infection	1	4	0.555212	0.952	ko05163	MSTRG.21600(Itpr3)	K04960
Human Diseases	Cancers	MicroRNAs in cancer	1	4	0.555212	0.952	ko05206	MSTRG.5032(Irs2)	K07187
Human Diseases	Cancers	Hepatocellular carcinoma	1	4	0.555212	0.952	ko05225	MSTRG.20179(Arid1a)	K11653
Human Diseases	Immune diseases	Inflammatiory bowel disease (IBD)	1	4	0.555212	0.952	ko05321	MSTRG.21689(TRAV1-2)	K10784
Genetic Information Processing	Replication and repair	Fanconi anemia pathway	9	49	0.55576	0.952	ko03460	ENSGALG00000005279(BRIP1);ENSGALG00000028015(HES1);ENSGALG00000012592(RMI1);ENSGALG00000006052(WDR48);ENSGALG00000002055(HES4);ENSGALG00000000734(RPA4);ENSGALG00000010317(POLH);ENSGALG00000004670(ATRIP);ENSGALG00000007155(RMI2)	K15362+K06054+K10990+K15361+K06054+K10739+K03509+K10905+K15365
Cellular Processes	Cellular community - eukaryotes	Tight junction	26	144	0.56917	0.952	ko04530	ENSGALG00000017153(RDX);ENSGALG00000014718(MAP3K1);ENSGALG00000008797(WASL);ENSGALG00000028530(PRKACB);ENSGALG00000029292(PCNA);ENSGALG00000006462(PPP2CA);ENSGALG00000008779(ACTR2);ENSGALG00000003572(-);ENSGALG00000008398(MPP4);ENSGALG00000001476(-);ENSGALG00000009621(ACTB);ENSGALG00000038635(-);ENSGALG00000014854(MYL12A);ENSGALG00000016022(RUNX1);ENSGALG00000014922(ROCK1);ENSGALG00000003487(RAB8…	K05762+K04416+K05747+K04345+K04802+K04382+K17260+K21066+K21109+K04353+K05692+K12757+K12757+K08367+K04514+K07902+K04503+K05719+K04513+K10352+K10352+K07374+K04393+K06099+K04440+K18584
Metabolism	Lipid metabolism	Synthesis and degradation of ketone bodies	2	10	0.571873	0.952	ko00072	ENSGALG00000017163(ACAT1);ENSGALG00000011659(ACAT2)	K00626+K00626
Human Diseases	Cancers	Viral carcinogenesis	2	10	0.571873	0.952	ko05203	MSTRG.12843(--);MSTRG.31586(--)	K06053+K06053
Environmental Information Processing	Signal transduction	TGF-beta signaling pathway	14	78	0.581532	0.952	ko04350	ENSGALG00000005198(RPS6KB1);ENSGALG00000006462(PPP2CA);ENSGALG00000009903(IFNG);ENSGALG00000011442(TGFBR2);ENSGALG00000008459(BMPR2);ENSGALG00000029545(Smad7b);ENSGALG00000033631(MYC);ENSGALG00000014795(TGIF1);ENSGALG00000037160(-);ENSGALG00000036001(SMAD2Z);ENSGALG00000014922(ROCK1);ENSGALG00000036941(CUL1);ENSGALG00000011993(RBX1);ENSGALG00000003806(RHOA)	K04688+K04382+K04687+K04388+K04671+K19631+K04377+K19383+K19631+K04500+K04514+K03347+K03868+K04513
Metabolism	Glycan biosynthesis and metabolism	Other types of O-glycan biosynthesis	4	22	0.593684	0.952	ko00514	ENSGALG00000022891(B4GALT3);ENSGALG00000009532(GXYLT1);ENSGALG00000010094(B4GALT2);ENSGALG00000038515(LFNG)	K07968+K13676+K07967+K05948
Metabolism	Lipid metabolism	Fatty acid elongation	5	28	0.602682	0.952	ko00062	ENSGALG00000041163(ABHD17A);ENSGALG00000000652(ACOT7);ENSGALG00000016124(HADH);ENSGALG00000011704(HACD2);ENSGALG00000016314(ELOVL5)	K01076+K17360+K00022+K10703+K10244
Human Diseases	Endocrine and metabolic diseases	AGE-RAGE signaling pathway in diabetic complications	15	85	0.609688	0.952	ko04933	ENSGALG00000014786(PIK3R1);ENSGALG00000033507(PLCG2);ENSGALG00000012304(NFKB1);ENSGALG00000008907(PLCB4);ENSGALG00000011442(TGFBR2);ENSGALG00000054458(AKT2);ENSGALG00000005805(PLCD1);ENSGALG00000036001(SMAD2Z);ENSGALG00000002583(PIK3CD);ENSGALG00000042534(NFATC1);ENSGALG00000006707(NOX1);ENSGALG00000007555(CCND1);ENSGALG00000017034(FOXO1);ENSGALG00000004796(CDC42);ENSGALG00000006109(MAPK8)	K02649+K05859+K02580+K05858+K04388+K04456+K05857+K04500+K00922+K04446+K08008+K04503+K07201+K04393+K04440
Metabolism	Carbohydrate metabolism	Glyoxylate and dicarboxylate metabolism	6	34	0.6109	0.952	ko00630	ENSGALG00000017163(ACAT1);ENSGALG00000011659(ACAT2);ENSGALG00000008858(MDH1);ENSGALG00000001949(MDH2);ENSGALG00000011950(ACO2);ENSGALG00000005888(PGP)	K00626+K00626+K00025+K00026+K01681+K19269
Environmental Information Processing	Signal transduction	ErbB signaling pathway	14	80	0.6224	0.952	ko04012	ENSGALG00000006426(PAK2);ENSGALG00000014786(PIK3R1);ENSGALG00000005198(RPS6KB1);ENSGALG00000033507(PLCG2);ENSGALG00000007687(MAP2K1);ENSGALG00000003205(EIF4EBP1);ENSGALG00000028318(CDKN1A);ENSGALG00000033631(MYC);ENSGALG00000054458(AKT2);ENSGALG00000002583(PIK3CD);ENSGALG00000003339(MTOR);ENSGALG00000004998(RAF1);ENSGALG00000006109(MAPK8);ENSGALG00000014977(GSK3B)	K04410+K02649+K04688+K05859+K04368+K07205+K06625+K04377+K04456+K00922+K07203+K04366+K04440+K03083
Metabolism	Amino acid metabolism	Arginine biosynthesis	3	17	0.627104	0.952	ko00220	ENSGALG00000038096(NOS2);ENSGALG00000034735(-);ENSGALG00000002321(GOT2)	K13241+K00261+K14455
Metabolism	Metabolism of cofactors and vitamins	Nicotinate and nicotinamide metabolism	5	29	0.635628	0.952	ko00760	ENSGALG00000008179(NT5C2);ENSGALG00000015156(NMRK1);ENSGALG00000031397(NT5C3A);ENSGALG00000008098(NAMPT);ENSGALG00000030120(ITGB1BP3)	K01081+K10524+K01081+K03462+K10524
Metabolism	Amino acid metabolism	Phenylalanine, tyrosine and tryptophan biosynthesis	1	5	0.636806	0.952	ko00400	ENSGALG00000002321(GOT2)	K14455
Organismal Systems	Immune system	C-type lectin receptor signaling pathway	1	5	0.636806	0.952	ko04625	MSTRG.21600(Itpr3)	K04960
Organismal Systems	Nervous system	Dopaminergic synapse	1	5	0.636806	0.952	ko04728	MSTRG.21600(Itpr3)	K04960
Organismal Systems	Nervous system	Long-term depression	1	5	0.636806	0.952	ko04730	MSTRG.21600(Itpr3)	K04960
Organismal Systems	Endocrine system	Parathyroid hormone synthesis, secretion and action	1	5	0.636806	0.952	ko04928	MSTRG.21600(Itpr3)	K04960
Environmental Information Processing	Signal transduction	VEGF signaling pathway	10	58	0.638647	0.952	ko04370	ENSGALG00000014786(PIK3R1);ENSGALG00000033507(PLCG2);ENSGALG00000023648(PPP3R1);ENSGALG00000007687(MAP2K1);ENSGALG00000040606(RAC3);ENSGALG00000054458(AKT2);ENSGALG00000002583(PIK3CD);ENSGALG00000012456(RAC2);ENSGALG00000004998(RAF1);ENSGALG00000004796(CDC42)	K02649+K05859+K06268+K04368+K07861+K04456+K00922+K07860+K04366+K04393
Environmental Information Processing	Signal transduction	MAPK signaling pathway	44	250	0.646682	0.952	ko04010	ENSGALG00000011917(PPM1A);ENSGALG00000014718(MAP3K1);ENSGALG00000006426(PAK2);ENSGALG00000028530(PRKACB);ENSGALG00000040651(IGF1R);ENSGALG00000012356(TAB2);ENSGALG00000008970(NRK);ENSGALG00000023648(PPP3R1);ENSGALG00000036093(PTPN7);ENSGALG00000007687(MAP2K1);ENSGALG00000012304(NFKB1);ENSGALG00000002850(RASA2);ENSGALG00000009927(RAP1B);ENSGALG00000003642(PDGFA);ENSGALG00000011442(TGFBR2);ENSGALG0…	K04457+K04416+K04410+K04345+K05087+K04404+K04407+K06268+K18019+K04368+K02580+K08053+K07836+K04359+K04388+K04442+K04377+K04358+K07861+K07830+K21946+K03283+K04353+K20216+K04456+K04389+K04402+K21278+K04379+K04433+K04459+K04446+K04402+K04374+K04445+K04415+K03175+K07860+K04381+K04366+K04393+K04440+K04352+K04390
Cellular Processes	Transport and catabolism	Lysosome	19	110	0.652818	0.952	ko04142	ENSGALG00000044661(-);ENSGALG00000008836(ATP6AP1);ENSGALG00000011621(IGF2R);ENSGALG00000008572(LAMP2);ENSGALG00000006876(CTSA);ENSGALG00000007462(CTSZ);ENSGALG00000016479(LAPTM4A);ENSGALG00000010091(ATP6V0B);ENSGALG00000037697(LAMP1);ENSGALG00000003256(ATP6V0A1);ENSGALG00000004252(-);ENSGALG00000009936(AP4S1);ENSGALG00000041787(PLA2G15);ENSGALG00000012610(CTSV);ENSGALG00000002237(ATP6V0D1);ENSGAL…	K01319+K03662+K06564+K06528+K13289+K08568+K12387+K03661+K06528+K02154+K01365+K12403+K06129+K01365+K02146+K12387+K12384+K12398+K12394
Metabolism	Nucleotide metabolism	Pyrimidine metabolism	17	99	0.658984	0.952	ko00240	ENSGALG00000007793(UPRT);ENSGALG00000008179(NT5C2);ENSGALG00000010863(TWISTNB);ENSGALG00000036019(POLR2K);ENSGALG00000032273(POLR1B);ENSGALG00000038595(POLR2I);ENSGALG00000002932(NME2);ENSGALG00000008936(-);ENSGALG00000031397(NT5C3A);ENSGALG00000008534(POLR2H);ENSGALG00000002057(POLR2D);ENSGALG00000006627(UPB1);ENSGALG00000004947(POLR3A);ENSGALG00000012291(POLR2F);ENSGALG00000005509(DPYD);ENSGALG…	K00761+K01081+K03004+K03009+K03002+K03017+K00940+K01510+K01081+K03016+K03012+K01431+K03018+K03014+K00207+K13421+K13809
Organismal Systems	Endocrine system	GnRH signaling pathway	14	82	0.661252	0.952	ko04912	ENSGALG00000014718(MAP3K1);ENSGALG00000028530(PRKACB);ENSGALG00000007687(MAP2K1);ENSGALG00000030859(GNAS);ENSGALG00000008907(PLCB4);ENSGALG00000004370(MAP2K6);ENSGALG00000010023(CALM2);ENSGALG00000012135(ATF4);ENSGALG00000026445(CALM1);ENSGALG00000003837(ADCY7);ENSGALG00000004998(RAF1);ENSGALG00000004796(CDC42);ENSGALG00000006109(MAPK8);MSTRG.21600(Itpr3)	K04416+K04345+K04368+K04632+K05858+K04433+K02183+K04374+K02183+K08047+K04366+K04393+K04440+K04960
Metabolism	Carbohydrate metabolism	Butanoate metabolism	4	24	0.665793	0.952	ko00650	ENSGALG00000017163(ACAT1);ENSGALG00000011659(ACAT2);ENSGALG00000002899(AACS);ENSGALG00000016124(HADH)	K00626+K00626+K01907+K00022
Metabolism	Carbohydrate metabolism	Starch and sucrose metabolism	5	30	0.666838	0.952	ko00500	ENSGALG00000004956(GPI);ENSGALG00000009036(GANC);ENSGALG00000011016(PGM1);ENSGALG00000039394(PGM2);ENSGALG00000035535(GYG1)	K01810+K12317+K01835+K15779+K00750
Metabolism	Carbohydrate metabolism	Inositol phosphate metabolism	12	71	0.670743	0.952	ko00562	ENSGALG00000034487(IMPA1);ENSGALG00000007590(MTMR8);ENSGALG00000033507(PLCG2);ENSGALG00000009068(ITPKB);ENSGALG00000008907(PLCB4);ENSGALG00000005805(PLCD1);ENSGALG00000003634(PTEN);ENSGALG00000002583(PIK3CD);ENSGALG00000035773(PIK3C3);ENSGALG00000031538(PI4K2B);ENSGALG00000002739(INPP5K);ENSGALG00000001606(INPP5B)	K01092+K18083+K05859+K00911+K05858+K05857+K01110+K00922+K00914+K13711+K01106+K01099
Metabolism	Metabolism of cofactors and vitamins	Thiamine metabolism	2	12	0.675096	0.952	ko00730	ENSGALG00000016363(ACP1);ENSGALG00000001568(NFS1)	K14394+K04487
Metabolism	Lipid metabolism	Glycerolipid metabolism	10	60	0.682848	0.952	ko00561	ENSGALG00000016329(AGPAT5);ENSGALG00000011571(AGPAT4);ENSGALG00000032736(MGLL);ENSGALG00000016456(LPIN1);ENSGALG00000003518(GPAT4);ENSGALG00000045122(AKR1B10L1);ENSGALG00000040418(DGAT2);ENSGALG00000014836(LPIN2);ENSGALG00000001730(DGKD);ENSGALG00000012681(MBOAT1)	K19007+K13523+K01054+K15728+K13506+K00011+K11160+K15728+K00901+K13517
Metabolism	Global and overview maps	Carbon metabolism	17	101	0.692636	0.952	ko01200	ENSGALG00000017163(ACAT1);ENSGALG00000033888(IDH3B);ENSGALG00000011659(ACAT2);ENSGALG00000004956(GPI);ENSGALG00000008858(MDH1);ENSGALG00000029576(PDHB);ENSGALG00000034735(-);ENSGALG00000008818(IDH1);ENSGALG00000004908(-);ENSGALG00000054449(SDHC);ENSGALG00000012613(FBP1);ENSGALG00000001949(MDH2);ENSGALG00000011950(ACO2);ENSGALG00000002321(GOT2);ENSGALG00000005888(PGP);ENSGALG00000016430(PDHA1);ENS…	K00626+K00030+K00626+K01810+K00025+K00162+K00261+K00031+K00948+K00236+K03841+K00026+K01681+K14455+K19269+K00161+K00615
Metabolism	Metabolism of other amino acids	Glutathione metabolism	7	43	0.697159	0.952	ko00480	ENSGALG00000028551(-);ENSGALG00000032922(GSTM2);ENSGALG00000010569(TXNDC12);ENSGALG00000008818(IDH1);ENSGALG00000037781(GSR);ENSGALG00000016379(SMS);ENSGALG00000016313(GCLC)	K00799+K00799+K05360+K00031+K00383+K00802+K11204
Metabolism	Amino acid metabolism	Lysine degradation	9	55	0.701152	0.952	ko00310	ENSGALG00000017163(ACAT1);ENSGALG00000000843(DOT1L);ENSGALG00000011659(ACAT2);ENSGALG00000003299(NSD3);ENSGALG00000016124(HADH);ENSGALG00000014152(KMT5B);ENSGALG00000035800(CAMKMT);MSTRG.9994(--);MSTRG.9997(NSD1)	K00626+K11427+K00626+K11425+K00022+K11429+K18826+K15588+K15588
Organismal Systems	Endocrine system	Melanogenesis	15	90	0.701515	0.952	ko04916	ENSGALG00000028530(PRKACB);ENSGALG00000006480(TCF7);ENSGALG00000007687(MAP2K1);ENSGALG00000030859(GNAS);ENSGALG00000039583(cmi9);ENSGALG00000008907(PLCB4);ENSGALG00000041700(GNAI3);ENSGALG00000031960(LEF1);ENSGALG00000010023(CALM2);ENSGALG00000026445(CALM1);ENSGALG00000008382(GNAI1);ENSGALG00000035645(GNAI2);ENSGALG00000003837(ADCY7);ENSGALG00000004998(RAF1);ENSGALG00000014977(GSK3B)	K04345+K02620+K04368+K04632+K09455+K05858+K04630+K04492+K02183+K02183+K04630+K04630+K08047+K04366+K03083
Organismal Systems	Immune system	Th17 cell differentiation	1	6	0.703445	0.952	ko04659	MSTRG.21689(TRAV1-2)	K10784
Organismal Systems	Immune system	T cell receptor signaling pathway	1	6	0.703445	0.952	ko04660	MSTRG.21689(TRAV1-2)	K10784
Organismal Systems	Sensory system	Inflammatory mediator regulation of TRP channels	1	6	0.703445	0.952	ko04750	MSTRG.21600(Itpr3)	K04960
Human Diseases	Cancers	Transcriptional misregulation in cancers	1	6	0.703445	0.952	ko05202	MSTRG.21689(TRAV1-2)	K10784
Human Diseases	Cancers	Proteoglycans in cancer	1	6	0.703445	0.952	ko05205	MSTRG.21600(Itpr3)	K04960
Environmental Information Processing	Signal transduction	Wnt signaling pathway	20	119	0.704527	0.952	ko04310	ENSGALG00000028530(PRKACB);ENSGALG00000006480(TCF7);ENSGALG00000023648(PPP3R1);ENSGALG00000009320(PSEN1);ENSGALG00000008907(PLCB4);ENSGALG00000033631(MYC);ENSGALG00000002229(FBXW11);ENSGALG00000040606(RAC3);ENSGALG00000031960(LEF1);ENSGALG00000001364(CSNK1A1L);ENSGALG00000036941(CUL1);ENSGALG00000042534(NFATC1);ENSGALG00000011993(RBX1);ENSGALG00000007555(CCND1);ENSGALG00000012456(RAC2);ENSGALG000…	K04345+K02620+K06268+K04505+K05858+K04377+K03362+K07861+K04492+K08957+K03347+K04446+K03868+K04503+K07860+K04513+K04496+K04440+K03083+K04508
Human Diseases	Infectious diseases	Epstein-Barr virus infection	2	13	0.718616	0.961	ko05169	MSTRG.12843(--);MSTRG.31586(--)	K06053+K06053
Metabolism	Metabolism of other amino acids	beta-Alanine metabolism	4	26	0.728632	0.961	ko00410	ENSGALG00000019514(CNDP2);ENSGALG00000006627(UPB1);ENSGALG00000005509(DPYD);ENSGALG00000016379(SMS)	K08660+K01431+K00207+K00802
Metabolism	Metabolism of cofactors and vitamins	Folate biosynthesis	4	26	0.728632	0.961	ko00790	ENSGALG00000009587(GPHN);ENSGALG00000045122(AKR1B10L1);ENSGALG00000030070(QDPR);ENSGALG00000031130(GGH)	K15376+K00011+K00357+K01307
Metabolism	Lipid metabolism	Biosynthesis of unsaturated fatty acids	4	26	0.728632	0.961	ko01040	ENSGALG00000000652(ACOT7);ENSGALG00000034502(SCD5);ENSGALG00000011704(HACD2);ENSGALG00000016314(ELOVL5)	K17360+K00507+K10703+K10244
Metabolism	Carbohydrate metabolism	Glycolysis / Gluconeogenesis	8	51	0.742328	0.965	ko00010	ENSGALG00000004956(GPI);ENSGALG00000029576(PDHB);ENSGALG00000035836(LDHB);ENSGALG00000006300(LDHA);ENSGALG00000011016(PGM1);ENSGALG00000039394(PGM2);ENSGALG00000012613(FBP1);ENSGALG00000016430(PDHA1)	K01810+K00162+K00016+K00016+K01835+K15779+K03841+K00161
Metabolism	Carbohydrate metabolism	Galactose metabolism	5	33	0.749543	0.965	ko00052	ENSGALG00000009036(GANC);ENSGALG00000010094(B4GALT2);ENSGALG00000045122(AKR1B10L1);ENSGALG00000011016(PGM1);ENSGALG00000039394(PGM2)	K12317+K07967+K00011+K01835+K15779
Metabolism	Amino acid metabolism	Phenylalanine metabolism	2	14	0.757117	0.965	ko00360	ENSGALG00000006326(MIF);ENSGALG00000002321(GOT2)	K07253+K14455
Metabolism	Metabolism of cofactors and vitamins	Vitamin B6 metabolism	1	7	0.757869	0.965	ko00750	ENSGALG00000016205(PDXK)	K00868
Genetic Information Processing	Folding, sorting and degradation	Sulfur relay system	1	7	0.757869	0.965	ko04122	ENSGALG00000001568(NFS1)	K04487
Environmental Information Processing	Signal transduction	AMPK signaling pathway	1	7	0.757869	0.965	ko04152	MSTRG.5032(Irs2)	K07187
Human Diseases	Infectious diseases	Human papillomavirus infection	3	21	0.768689	0.973	ko05165	MSTRG.10184(Maml1);MSTRG.12843(--);MSTRG.31586(--)	K06061+K06053+K06053
Metabolism	Lipid metabolism	Glycerophospholipid metabolism	14	89	0.778346	0.979	ko00564	ENSGALG00000016329(AGPAT5);ENSGALG00000011571(AGPAT4);ENSGALG00000030406(CDS2);ENSGALG00000030185(PTDSS1);ENSGALG00000016456(LPIN1);ENSGALG00000003518(GPAT4);ENSGALG00000011481(GPD1L);ENSGALG00000013205(ETNK1);ENSGALG00000014836(LPIN2);ENSGALG00000041787(PLA2G15);ENSGALG00000001730(DGKD);ENSGALG00000006872(PISD);ENSGALG00000036754(CHKA);ENSGALG00000012681(MBOAT1)	K19007+K13523+K00981+K08729+K15728+K13506+K00006+K00894+K15728+K06129+K00901+K01613+K14156+K13517
Genetic Information Processing	Replication and repair	Base excision repair	4	28	0.782194	0.979	ko03410	ENSGALG00000034473(PARP4);ENSGALG00000029292(PCNA);ENSGALG00000042875(HMGB1);MSTRG.27045(APEX1)	K10798+K04802+K10802+K10771
Metabolism	Metabolism of cofactors and vitamins	Ubiquinone and other terpenoid-quinone biosynthesis	1	8	0.802315	0.987	ko00130	ENSGALG00000041294(COQ2)	K06125
Organismal Systems	Nervous system	Glutamatergic synapse	1	8	0.802315	0.987	ko04724	MSTRG.21600(Itpr3)	K04960
Human Diseases	Endocrine and metabolic diseases	Insulin resistance	1	8	0.802315	0.987	ko04931	MSTRG.5032(Irs2)	K07187
Environmental Information Processing	Signaling molecules and interaction	Cytokine-cytokine receptor interaction	35	215	0.811052	0.992	ko04060	ENSGALG00000006388(IL16);ENSGALG00000030800(IL31RA);ENSGALG00000011849(IL2);ENSGALG00000021031(ACKR3);ENSGALG00000015235(XCL1);ENSGALG00000040621(IL18R1);ENSGALG00000016788(IL18RAP);ENSGALG00000035733(CCR7);ENSGALG00000013869(IL20RA);ENSGALG00000009903(IFNG);ENSGALG00000016852(TNFSF13B);ENSGALG00000033887(IL17RA);ENSGALG00000011442(TGFBR2);ENSGALG00000008459(BMPR2);ENSGALG00000052935(TNFRSF9);ENS…	K22628+K22630+K05429+K04304+K05507+K05173+K05174+K04182+K05136+K04687+K05476+K05164+K04388+K04671+K05146+K04186+K04180+K04180+K04192+K12964+K12499+K05131+K05133+K05142+K05157+K04389+K05070+K05514+K05471+K05071+K05075+K05072+K06454+K04390+K05172
Environmental Information Processing	Membrane transport	ABC transporters	5	36	0.815953	0.993	ko02010	ENSGALG00000016164(ABCG1);ENSGALG00000006646(ABCC1);ENSGALG00000005647(ABCD3);ENSGALG00000053916(ABCB1);ENSGALG00000011096(ABCB10)	K05679+K05665+K05677+K05658+K05657
Metabolism	Xenobiotics biodegradation and metabolism	Drug metabolism - other enzymes	8	56	0.831169	0.997	ko00983	ENSGALG00000028551(-);ENSGALG00000006910(IMPDH2);ENSGALG00000032922(GSTM2);ENSGALG00000002932(NME2);ENSGALG00000003250(ITPA);ENSGALG00000006627(UPB1);ENSGALG00000005509(DPYD);ENSGALG00000011770(UMPS)	K00799+K00088+K00799+K00940+K01519+K01431+K00207+K13421
Organismal Systems	Circulatory system	Cardiac muscle contraction	8	56	0.831169	0.997	ko04260	ENSGALG00000025819(UQCRFS1);ENSGALG00000002490(UQCRC2);ENSGALG00000015233(ATP1B1);ENSGALG00000035996(COX6C);ENSGALG00000002764(ATP1B3);ENSGALG00000002563(TPM4);ENSGALG00000013537(TPM3);ENSGALG00000014121(COX5A)	K00411+K00415+K01540+K02268+K01540+K10375+K09290+K02264
Metabolism	Nucleotide metabolism	Purine metabolism	25	159	0.833306	0.997	ko00230	ENSGALG00000020534(AK6);ENSGALG00000014727(PDE4D);ENSGALG00000008179(NT5C2);ENSGALG00000010863(TWISTNB);ENSGALG00000006910(IMPDH2);ENSGALG00000036019(POLR2K);ENSGALG00000031000(APRT);ENSGALG00000032273(POLR1B);ENSGALG00000013728(PPAT);ENSGALG00000038595(POLR2I);ENSGALG00000006035(PDE3B);ENSGALG00000002932(NME2);ENSGALG00000008936(-);ENSGALG00000004908(-);ENSGALG00000031397(NT5C3A);ENSGALG00000008…	K18532+K13293+K01081+K03004+K00088+K03009+K00759+K03002+K00764+K03017+K13296+K00940+K01510+K00948+K01081+K03016+K01835+K01519+K13293+K15779+K03012+K03018+K03014+K00856+K08047
Environmental Information Processing	Signal transduction	Ras signaling pathway	1	9	0.83861	0.998	ko04014	MSTRG.21689(TRAV1-2)	K10784
Genetic Information Processing	Replication and repair	Homologous recombination	5	38	0.851816	1	ko03440	ENSGALG00000009733(SEM1);ENSGALG00000005279(BRIP1);ENSGALG00000012876(SSBP1);ENSGALG00000005383(BRCC3);ENSGALG00000000734(RPA4)	K10881+K15362+K03111+K11864+K10739
Metabolism	Amino acid metabolism	Valine, leucine and isoleucine degradation	6	45	0.858235	1	ko00280	ENSGALG00000017163(ACAT1);ENSGALG00000011659(ACAT2);ENSGALG00000002899(AACS);ENSGALG00000016124(HADH);ENSGALG00000040702(BCKDHB);ENSGALG00000005280(DBT)	K00626+K00626+K01907+K00022+K00167+K09699
Metabolism	Carbohydrate metabolism	Amino sugar and nucleotide sugar metabolism	6	45	0.858235	1	ko00520	ENSGALG00000004956(GPI);ENSGALG00000012414(GNPNAT1);ENSGALG00000013229(CMAS);ENSGALG00000011016(PGM1);ENSGALG00000039394(PGM2);MSTRG.7996(Fuk)	K01810+K00621+K21749+K01835+K15779+K05305
Metabolism	Carbohydrate metabolism	Fructose and mannose metabolism	4	32	0.863879	1	ko00051	ENSGALG00000045122(AKR1B10L1);ENSGALG00000012613(FBP1);ENSGALG00000002099(-);MSTRG.7996(Fuk)	K00011+K03841+K19030+K05305
Genetic Information Processing	Folding, sorting and degradation	Ubiquitin mediated proteolysis	19	127	0.868154	1	ko04120	ENSGALG00000036739(UBE2L3);ENSGALG00000016739(HERC2);ENSGALG00000014718(MAP3K1);ENSGALG00000041795(WWP1);ENSGALG00000005006(UBA2);ENSGALG00000008491(XIAP);ENSGALG00000005667(UBE2G2);ENSGALG00000005108(CUL3);ENSGALG00000007970(PIAS1);ENSGALG00000000699(WWP2);ENSGALG00000038128(UBE2D2);ENSGALG00000028643(ANAPC10);ENSGALG00000002229(FBXW11);ENSGALG00000031975(UBE2H);ENSGALG00000036941(CUL1);ENSGALG0…	K04552+K10595+K04416+K05633+K10685+K04725+K04555+K03869+K04706+K05630+K06689+K03357+K03362+K10576+K03347+K03868+K03175+K10688+K03364
Metabolism	Amino acid metabolism	Alanine, aspartate and glutamate metabolism	4	34	0.89381	1	ko00250	ENSGALG00000015275(NIT2);ENSGALG00000034735(-);ENSGALG00000013728(PPAT);ENSGALG00000002321(GOT2)	K13566+K00261+K00764+K14455
Metabolism	Amino acid metabolism	Histidine metabolism	2	20	0.904798	1	ko00340	ENSGALG00000019514(CNDP2);ENSGALG00000015155(CARNMT1)	K08660+K19787
Metabolism	Amino acid metabolism	Arginine and proline metabolism	5	42	0.906234	1	ko00330	ENSGALG00000038096(NOS2);ENSGALG00000019514(CNDP2);ENSGALG00000004325(P4HA1);ENSGALG00000002321(GOT2);ENSGALG00000016379(SMS)	K13241+K08660+K00472+K14455+K00802
Genetic Information Processing	Replication and repair	Non-homologous end-joining	1	12	0.912207	1	ko03450	ENSGALG00000011932(XRCC6)	K10884
Organismal Systems	Endocrine system	Adipocytokine signaling pathway	8	63	0.913083	1	ko04920	ENSGALG00000008107(IRS4);ENSGALG00000005206(ACSL3);ENSGALG00000012304(NFKB1);ENSGALG00000027864(NFKBIA);ENSGALG00000054458(AKT2);ENSGALG00000003339(MTOR);ENSGALG00000006109(MAPK8);MSTRG.5032(Irs2)	K07187+K01897+K02580+K04734+K04456+K07203+K04440+K07187
Cellular Processes	Transport and catabolism	Peroxisome	10	78	0.926976	1	ko04146	ENSGALG00000011661(SOD2);ENSGALG00000008421(PEX16);ENSGALG00000005206(ACSL3);ENSGALG00000038096(NOS2);ENSGALG00000013777(-);ENSGALG00000010243(PRDX1);ENSGALG00000008818(IDH1);ENSGALG00000012809(ECI2);ENSGALG00000005647(ABCD3);ENSGALG00000002683(DECR2)	K04564+K13335+K01897+K13241+K13336+K13279+K00031+K13239+K05677+K13237
Environmental Information Processing	Signal transduction	Calcium signaling pathway	24	168	0.934296	1	ko04020	ENSGALG00000004613(P2RX5);ENSGALG00000028530(PRKACB);ENSGALG00000006503(VDAC1);ENSGALG00000033507(PLCG2);ENSGALG00000023648(PPP3R1);ENSGALG00000038096(NOS2);ENSGALG00000030859(GNAS);ENSGALG00000032287(ATP2A2);ENSGALG00000009068(ITPKB);ENSGALG00000003863(P2RX7);ENSGALG00000008907(PLCB4);ENSGALG00000041463(VDAC3);ENSGALG00000005805(PLCD1);ENSGALG00000014355(STIM2);ENSGALG00000006642(ADORA2A);ENSGAL…	K05219+K04345+K05862+K05859+K06268+K13241+K04632+K05853+K00911+K05220+K05858+K15041+K05857+K18196+K04266+K02183+K02183+K08047+K04163+K05863+K07190+K04960+K10784+K05863
Metabolism	Lipid metabolism	Steroid biosynthesis	1	16	0.96104	1	ko00100	ENSGALG00000006050(CYP2R1)	K07419
Metabolism	Glycan biosynthesis and metabolism	Glycosaminoglycan biosynthesis - chondroitin sulfate / dermatan sulfate	1	16	0.96104	1	ko00532	ENSGALG00000036477(CHPF2)	K03419
Metabolism	Energy metabolism	Nitrogen metabolism	1	16	0.96104	1	ko00910	ENSGALG00000034735(-)	K00261
Metabolism	Glycan biosynthesis and metabolism	Other glycan degradation	1	17	0.968205	1	ko00511	ENSGALG00000013773(FUCA2)	K01206
Metabolism	Glycan biosynthesis and metabolism	Glycosaminoglycan degradation	1	17	0.968205	1	ko00531	ENSGALG00000011203(HPSE)	K07964
Metabolism	Global and overview maps	Biosynthesis of amino acids	6	59	0.971715	1	ko01230	ENSGALG00000033888(IDH3B);ENSGALG00000008818(IDH1);ENSGALG00000004908(-);ENSGALG00000011950(ACO2);ENSGALG00000002321(GOT2);ENSGALG00000005309(TKT)	K00030+K00031+K00948+K01681+K14455+K00615
Metabolism	Amino acid metabolism	Tryptophan metabolism	3	36	0.972546	1	ko00380	ENSGALG00000017163(ACAT1);ENSGALG00000011659(ACAT2);ENSGALG00000016124(HADH)	K00626+K00626+K00022
Metabolism	Carbohydrate metabolism	Pentose and glucuronate interconversions	1	18	0.974054	1	ko00040	ENSGALG00000045122(AKR1B10L1)	K00011
Metabolism	Metabolism of cofactors and vitamins	One carbon pool by folate	1	18	0.974054	1	ko00670	ENSGALG00000034344(MTHFD2)	K13403
Metabolism	Xenobiotics biodegradation and metabolism	Drug metabolism - cytochrome P450	2	29	0.979114	1	ko00982	ENSGALG00000028551(-);ENSGALG00000032922(GSTM2)	K00799+K00799
Organismal Systems	Endocrine system	PPAR signaling pathway	6	62	0.980674	1	ko03320	ENSGALG00000004509(UBB);ENSGALG00000005206(ACSL3);ENSGALG00000010681(CPT2);ENSGALG00000034502(SCD5);ENSGALG00000012112(DBI);ENSGALG00000002891(ACADL)	K08770+K01897+K08766+K00507+K08762+K00255
Metabolism	Glycan biosynthesis and metabolism	Glycosylphosphatidylinositol(GPI)-anchor biosynthesis	1	21	0.985904	1	ko00563	ENSGALG00000004492(PIGL)	K03434
Metabolism	Amino acid metabolism	Tyrosine metabolism	2	32	0.987646	1	ko00350	ENSGALG00000006326(MIF);ENSGALG00000002321(GOT2)	K07253+K14455
Metabolism	Xenobiotics biodegradation and metabolism	Metabolism of xenobiotics by cytochrome P450	2	32	0.987646	1	ko00980	ENSGALG00000028551(-);ENSGALG00000032922(GSTM2)	K00799+K00799
Metabolism	Metabolism of cofactors and vitamins	Retinol metabolism	2	33	0.989647	1	ko00830	ENSGALG00000030376(DHRS3);ENSGALG00000011532(CYP27C1)	K11146+K17951
Metabolism	Lipid metabolism	Arachidonic acid metabolism	3	44	0.992293	1	ko00590	ENSGALG00000036837(PTGES3);ENSGALG00000027908(CYP2U1);ENSGALG00000033709(LTA4H)	K15730+K07422+K01254
Metabolism	Glycan biosynthesis and metabolism	Mucin type O-glycan biosynthesis	1	24	0.992345	1	ko00512	ENSGALG00000014944(GCNT4)	K09663
Metabolism	Amino acid metabolism	Glycine, serine and threonine metabolism	2	36	0.993933	1	ko00260	ENSGALG00000016651(-);ENSGALG00000003948(ALAS2)	K15789+K00643
Metabolism	Lipid metabolism	Sphingolipid metabolism	3	46	0.994444	1	ko00600	ENSGALG00000015682(UGCG);ENSGALG00000012018(UGT8);ENSGALG00000003701(SGMS1)	K00720+K04628+K04714
Environmental Information Processing	Signaling molecules and interaction	ECM-receptor interaction	5	74	0.998892	1	ko04512	ENSGALG00000050875(ITGB7);ENSGALG00000034007(ITGA6);ENSGALG00000007145(ITGB1);ENSGALG00000007905(LAMB1);MSTRG.33102(--)	K06590+K06485+K05719+K05636+K06824
Metabolism	Global and overview maps	Metabolic pathways	172	1134	0.999427	1	ko01100	ENSGALG00000028026(NDUFS4);ENSGALG00000025819(UQCRFS1);ENSGALG00000034487(IMPA1);ENSGALG00000016329(AGPAT5);ENSGALG00000015069(B4GALT4);ENSGALG00000022891(B4GALT3);ENSGALG00000004492(PIGL);ENSGALG00000007590(MTMR8);ENSGALG00000017163(ACAT1);ENSGALG00000020534(AK6);ENSGALG00000011571(AGPAT4);ENSGALG00000033888(IDH3B);ENSGALG00000007793(UPRT);ENSGALG00000005907(RPN1);ENSGALG00000030780(MGAT4A);ENSG…	K03937+K00411+K01092+K19007+K07969+K07968+K03434+K18083+K00626+K18532+K13523+K00030+K00761+K12666+K00738+K03949+K14394+K03662+K01054+K08967+K00626+K01810+K00720+K01081+K00415+K02579+K04628+K03004+K02138+K03954+K03945+K00981+K08729+K00741+K00025+K15728+K00088+K02268+K03009+K02134+K05859+K00162+K09663+K01897+K13241+K12317+K15730+K03661+K07967+K02133+K11353+K00911+K02154+K03849+K03968+K01599+K21052+…
Metabolism	Lipid metabolism	Ether lipid metabolism	1	39	0.999641	1	ko00565	ENSGALG00000012018(UGT8)	K04628
Environmental Information Processing	Signaling molecules and interaction	Neuroactive ligand-receptor interaction	10	268	1	1	ko04080	ENSGALG00000013548(GZMA);ENSGALG00000044661(-);ENSGALG00000004613(P2RX5);ENSGALG00000003863(P2RX7);ENSGALG00000020331(-);ENSGALG00000013218(C3AR1);ENSGALG00000014166(TSPO);ENSGALG00000006642(ADORA2A);ENSGALG00000014824(PTGER4);ENSGALG00000035081(HTR7L)	K01352+K01319+K05219+K05220+K04274+K04009+K05770+K04266+K04261+K04163
